# Supplementary material for: Survival outcomes and surgical intervention of small intestinal neuroendocrine tumors: a population based retrospective study
Source: PubMed Central journal article supplement (PMC5354882; doi:10.18632/oncotarget.13632), 2016-11-26
Supplement: oncotarget-08-4935-s001.pdf [file oncotarget-08-4935-s001.pdf]

## Survival outcomes and surgical intervention of small intestinal neuroendocrine tumors: a population based retrospective study

### SUPPLEMENTARY FIGURE

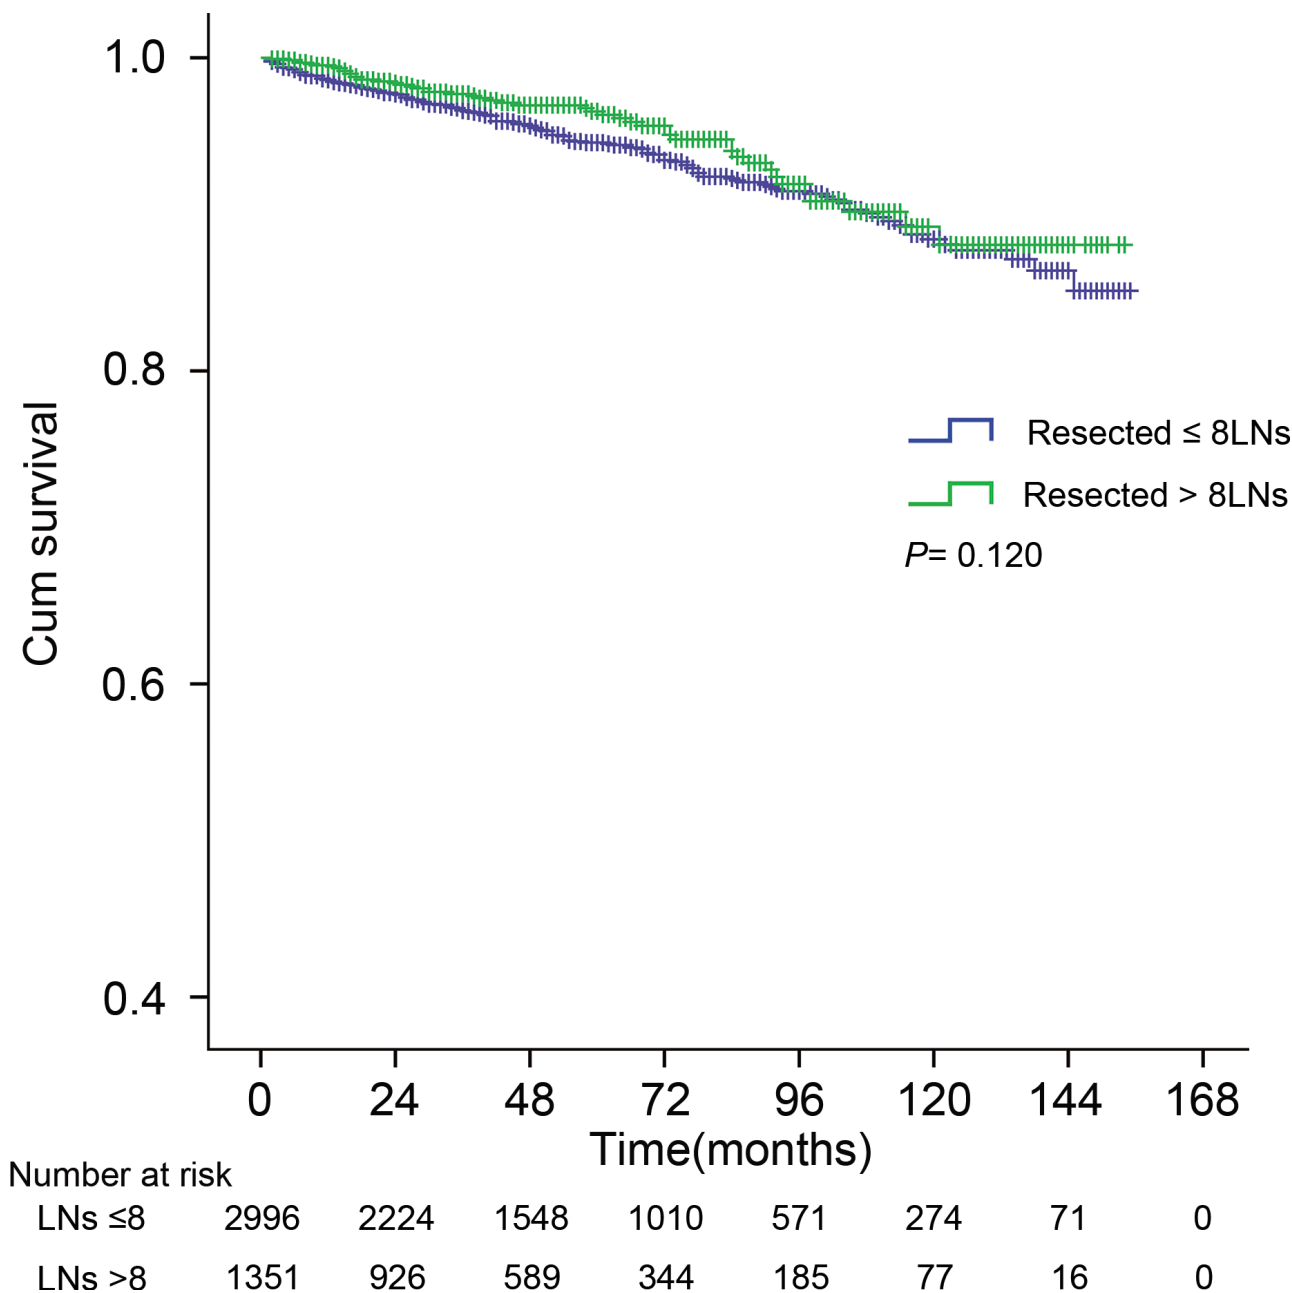

Supplementary Figure S1: The cancer-specific survival curve according to the number of lymph node removed in localized SiNETs patients. LN<sub>s</sub> of 8 was used as cutoff value. *P* value from log-rank test. LN<sub>s</sub>, lymph nodes.
